1 **Afucosylated *Plasmodium falciparum*-specific IgG is induced by infection but not**  
2 **by subunit vaccination**

3 Mads Delbo Larsen,<sup>1§</sup> Mary Lopez-Perez,<sup>2§</sup> Emmanuel Kakra Dickson,<sup>3</sup> Paulina Ampomah,<sup>4</sup>

4 Nicaise Tuikue Ndam,<sup>5</sup> Jan Nouta,<sup>6</sup> Carolien A M Koeleman,<sup>6</sup> Agnes L Hipgrave Ederveen,<sup>6</sup>

5 Benjamin Mordmüller,<sup>7,8</sup> Ali Salanti,<sup>2</sup> Morten Agertoug Nielsen,<sup>2</sup> Achille Massougbodji,<sup>9</sup> C. Ellen

6 van der Schoot,<sup>1</sup> Michael F. Ofori,<sup>3</sup> Manfred Wuhrer,<sup>6</sup> Lars Hviid<sup>2,10\*#</sup>, and Gestur Vidarsson<sup>1\*#</sup>

7 <sup>1</sup>Department of Experimental Immunohematology, Sanquin Research, Amsterdam, The

8 Netherlands, and Landsteiner Laboratory, Amsterdam UMC, University of Amsterdam, Amsterdam,

9 The Netherlands; <sup>2</sup>Centre for Medical Parasitology, Department of Immunology and Microbiology,

10 Faculty of Health and Medical Sciences, University of Copenhagen, Copenhagen, Denmark;

11 <sup>3</sup>Department of Immunology, Noguchi Memorial Institute for Medical Research, University of

12 Ghana, Accra, Ghana; <sup>4</sup>Department of Biomedical Sciences, School of Allied Health Sciences,

13 University of Cape Coast, Cape Coast, Ghana; <sup>5</sup>Université de Paris, MERIT, IRD, 75006 Paris,

14 France; <sup>6</sup>Center for Proteomics and Metabolomics, Leiden University Medical Center, Leiden, The

15 Netherlands; <sup>7</sup>Radboud University Medical Center, Department of Medical Microbiology,

16 Nijmegen, The Netherlands; <sup>8</sup>Universitätsklinikum Tübingen, Institut für Tropenmedizin,

17 Tübingen, Germany; <sup>9</sup>Centre d'Etude et de Recherche sur le Paludisme Associé à la Grossesse et à

18 l'Enfance (CERPAGE), Faculté des Sciences de la Santé, Université d'Abomey-Calavi, Benin;

19 <sup>10</sup>Centre for Medical Parasitology, Department of Infectious Diseases, Rigshospitalet, Copenhagen,

20 Denmark

21 §Shared first authorship

22 \* Shared senior authorship

23 #Correspondence: Gestur Vidarsson (Dept Exp Immunohematol, Sanquin Research, Plesmanlaan  
24 125, 1066 CX Amsterdam, The Netherlands; [g.vidarsson@sanquin.nl](mailto:g.vidarsson@sanquin.nl)) or Lars Hviid (Department  
25 of Immunology and Microbiology, Panum Institute 07-11-24, University of Copenhagen,  
26 Blegdamvej 3B, 2200 Copenhagen N, Denmark; [lhviid@sund.ku.dk](mailto:lhviid@sund.ku.dk))

27 Short title: Fc-fucosylation of VAR2CSA-specific IgG

28 ORCID IDs: <https://orcid.org/0000-0002-1985-5901> (MDL), [https://orcid.org/0000-0002-9876-](https://orcid.org/0000-0002-9876-0248)  
29 [0248](https://orcid.org/0000-0002-9876-0248) (MLP), <https://orcid.org/0000-0002-8863-7449> (PA), <https://orcid.org/0000-0001-9101-2768>  
30 (BM), <https://orcid.org/0000-0003-2207-5575> (AS), <https://orcid.org/0000-0003-2668-4992>  
31 (MAN), <https://orcid.org/0000-0002-8065-3540> (CEvdS), <https://orcid.org/0000-0003-2341-7514>  
32 (MFO), <https://orcid.org/0000-0002-0814-4995> (MW), <https://orcid.org/0000-0002-1698-4927>  
33 (LH), <https://orcid.org/0000-0001-5621-003X> (GV)

34 **Summary**

35           Afucosylated IgG has enhanced Fc-receptor affinity and functionality, and is formed  
36 specifically against membrane proteins of enveloped viruses. We show that this also applies to  
37 *Plasmodium falciparum* erythrocyte membrane-specific IgG induced by natural infection, but not  
38 by soluble PfEMP1 vaccination.

39 **Abstract**

40 IgG specific for members of the *Plasmodium falciparum* erythrocyte membrane  
41 protein 1 (PfEMP1) family, which mediates receptor- and tissue-specific sequestration of infected  
42 erythrocytes (IEs), is a central component of naturally acquired malaria immunity. PfEMP1-specific  
43 IgG is thought to protect via inhibition of IE sequestration, and through IgG-Fc Receptor (Fc $\gamma$ R)  
44 mediated phagocytosis and killing of antibody-opsonized IEs. The affinity of afucosylated IgG to  
45 Fc $\gamma$ RIIIa is elevated up to 40-fold compared to fucosylated IgG, resulting in enhanced antibody-  
46 dependent cellular cytotoxicity. Most IgG in plasma is fully fucosylated, but afucosylated IgG is  
47 elicited in response to enveloped viruses and to paternal alloantigens during pregnancy. Here we  
48 show that naturally acquired PfEMP1-specific IgG is likewise markedly afucosylated in a stable and  
49 exposure-dependent manner, and efficiently induces Fc $\gamma$ RIIIa-dependent natural killer (NK) cell  
50 degranulation. In contrast, immunization with a soluble subunit vaccine based on VAR2CSA-type  
51 PfEMP1 resulted in fully fucosylated specific IgG. These results have implications for  
52 understanding natural and vaccine-induced antibody-mediated protective immunity to malaria.

53 **Key words**

54 Acquired immunity, Fucosylation, GLURP, IgG, IgG glycosylation, Malaria, PfEMP1,  
55 *Plasmodium falciparum*, Vaccines, VAR2CSA

## 56 **Introduction**

57           The most severe form of malaria is caused by the protozoan parasite *Plasmodium falciparum*.  
58 The disease is currently estimated to cost around 400,000 lives a year, mostly of young children and  
59 pregnant women in sub-Saharan Africa. In addition, nearly 900,000 babies are born with a low birth  
60 weight as a consequence of placental malaria (PM) (World Health Organization, 2020). The  
61 particular virulence of *P. falciparum* is related to the efficient adhesion of the infected erythrocytes  
62 (IEs) to host receptors in the vasculature, such as endothelial protein C receptor, intercellular  
63 adhesion molecule 1, and oncofetal chondroitin sulfate A (Bengtsson et al., 2013; Fried and Duffy,  
64 1996; Lennartz et al., 2017; Turner et al., 2013), mediated by members of the protein family  
65 *P. falciparum* erythrocyte membrane protein 1 (PfEMP1), embedded in the membrane of IE (Hviid  
66 and Jensen, 2015). The sequestration of IEs can cause tissue-specific circulatory compromise and  
67 inflammation, which in turn can lead to severe and life-threatening complications such as cerebral  
68 malaria (CM) and PM (Jensen et al., 2020; Rogerson et al., 2007). Severe malaria in children has  
69 repeatedly been shown to be associated with parasites expressing particular subsets of PfEMP1,  
70 such as Group A and B/A (Jensen et al., 2004; Turner et al., 2013), whereas PM is strongly  
71 associated with parasites expressing VAR2CSA-type PfEMP1 (Salanti et al., 2004; Tuikue Ndam et  
72 al., 2005).

73           Acquired protective immunity to *P. falciparum* malaria is mainly mediated by IgG with  
74 specificity for antigens expressed by the asexual blood-stage parasites (Cohen et al., 1961). PfEMP1  
75 is a key target (Hviid and Jensen, 2015), although antibodies to other blood-stage antigens, such as  
76 the merozoite-specific antigens glutamate-rich protein (GLURP), merozoite surface protein 1 and  
77 reticulocyte binding protein homolog 5, also contribute to naturally acquired protection (Conway et  
78 al., 2000; Douglas et al., 2011; Kana et al., 2017). Importantly, the selective protection from severe  
79 malaria that develops early in childhood, is related to acquisition of IgG specific for Group A and

80 B/A PfEMP1 variants (Bull et al., 2000; Cham et al., 2010; Jensen et al., 2004). As a result, life-  
81 threatening complications are rare in teenagers and beyond in *P. falciparum* endemic regions. PM,  
82 which is caused by selective accumulation of VAR2CSA-positive IEs in the placenta from early in  
83 pregnancy (Ofori et al., 2018; Schmiegelow et al., 2017), constitutes an important exception to this  
84 rule. Only VAR2CSA mediates adhesion to placenta-specific chondroitin sulfate (Duffy et al.,  
85 2006; Salanti et al., 2004; Viebig et al., 2005). Because of this, and because antibodies specific for  
86 non-pregnancy-related types of PfEMP1 do not cross-react with VAR2CSA (Barfod et al., 2010;  
87 Salanti et al., 2004; Tuikue Ndam et al., 2006), primigravid women are immunologically naïve to  
88 VAR2CSA and therefore highly susceptible to PM, despite general protective immunity acquired  
89 during childhood. However, substantial IgG-mediated protection against PM is acquired in a parity-  
90 dependent manner, and PM is therefore mainly a problem in the first pregnancy (Fried and Duffy,  
91 1996; Fried et al., 1998; Ricke et al., 2000; Salanti et al., 2004; Staalsoe et al., 2004).

92 Acquired immunity mediated by PfEMP1-specific IgG is generally thought to rely on their  
93 ability to interfere directly with IE sequestration (i.e., neutralizing, adhesion-inhibitory antibodies).  
94 However, antibody-mediated opsonization of IEs is a likely additional effector function of these  
95 antibodies, since the antibody response to most *P. falciparum* asexual blood-stage antigens  
96 (including PfEMP1) is completely dominated by the cytophilic subclasses IgG1 and (to a lesser  
97 extent) IgG3 (Megnekou et al., 2005; Piper et al., 1999). Nevertheless, the relative importance of  
98 neutralization and opsonization remains largely unexplored. Complement-mediated destruction of  
99 IgG-coated IEs does not seem important (Larsen et al., 2019), suggesting that IgG opsonization of  
100 IEs by IgG functions mainly through IgG-Fc receptor (Fc $\gamma$ R)-dependent phagocytosis and antibody-  
101 dependent cellular cytotoxicity (ADCC) (Arora et al., 2018; Ataide et al., 2011; Marsh et al., 1989).  
102 The latter involves Fc $\gamma$ RIIIa (Ravetch and Perussia, 1989; Scallan et al., 1989). Binding of IgG to  
103 Fc $\gamma$ RIIIa critically depends on the composition of a highly conserved N-linked glycan at position

104 297 in the Fc region (Vidarsson et al., 2014). The level of fucosylation is of particular significance,  
105 since afucosylated IgG has up to 20-fold increased affinity for Fc $\gamma$ RIIIa (Dekkers et al., 2017;  
106 Ferrara et al., 2011). Even more strikingly, IgG-afucosylation can convert a non-functional ADCC  
107 potential to strong and clinically significant responses (Dekkers et al., 2017; Kapur et al., 2014b;  
108 Larsen et al., 2021; Shields et al., 2002; Temming et al., 2019; Wang et al., 2017). Increased  
109 galactosylation at N297 can further enhance affinity to Fc $\gamma$ RIII by additional two fold, and also  
110 increases the complement activating capacity of the antibody. In contrast, no influence of bisecting  
111 N-acetylglucosamine (GlcNAc) on antibody effector functions has been demonstrated so far  
112 (Dekkers et al., 2017).

113 Fc fucosylation of plasma IgG is near 100% at birth, and although it decreases slightly with  
114 age, it normally remains high (~94%) in adults (Bakovic et al., 2013; de Haan et al., 2016).  
115 Nevertheless, very marked and clinically significant reductions (down to ~10%) in antigen-specific  
116 IgG-Fc fucosylation is frequently observed after alloimmunization against erythrocyte and platelet  
117 alloantigens (Kapur et al., 2014a; Kapur et al., 2014b; Sonneveld et al., 2017; Sonneveld et al.,  
118 2016; Wuhler et al., 2009). Afucosylation has also been observed for antigen-specific IgG to  
119 various enveloped viruses (Ackerman et al., 2013; Larsen et al., 2021; Wang et al., 2017). In human  
120 immunodeficiency virus (HIV) infections, low Fc fucosylation has been proposed as a trait of elite  
121 controllers (Ackerman et al., 2013), but it is associated with Fc $\gamma$ RIIIa mediated immunopathology  
122 in SARS-CoV-2- and secondary dengue virus infections (Chakraborty et al., 2021; Larsen et al.,  
123 2021; Wang et al., 2017). Vaccination with the attenuated paramyxoviruses measles and mumps  
124 also results in specific IgG with reduced fucosylation similar to that acquired after natural infection  
125 (Larsen et al., 2021). In contrast, infection with the non-enveloped parvovirus B19, protein subunit  
126 vaccination against hepatitis B virus, vaccination with inactivated influenza virus, or vaccination

127 against tetanus, pneumococcal, and meningococcal disease do not induce selectively afucosylated  
128 IgG (Larsen et al., 2021; Selman et al., 2012; Vestrheim et al., 2014).

129         The above findings have led us to propose that afucosylated IgG has evolved as a beneficiary  
130 immune response to foreign antigens expressed on host membranes in the context of infections,  
131 which is mimicked in alloimmunizations with devastating consequences (Kapur et al., 2014a; Kapur  
132 et al., 2015; Kapur et al., 2014b; Larsen et al., 2021; Sonneveld et al., 2017; Sonneveld et al., 2016).  
133 In this study, we tested the hypothesis that antibody responses to *P. falciparum* antigens expressed  
134 on the IE surface are also a subject to afucosylation. To this end, we examined naturally acquired  
135 IgG responses to the PfEMP1 antigens VAR6 and VAR2CSA and to the merozoite antigen  
136 GLURP, and VAR2CSA-specific IgG induced by subunit vaccination.



## 137 **Results and discussion**

### 138 *Naturally acquired PfEMP1-specific IgG is highly afucosylated*

139 We first used a set of plasma samples collected from 127 pregnant Ghanaian women at the  
140 time of their first visit to antenatal clinics (Ofori et al., 2009), to assess N297 glycosylation of IgG  
141 with specificity for three *P. falciparum* recombinant antigens. We used the full ectodomains of  
142 VAR2CSA, and the non-pregnancy-restricted Group A-type VAR6, which are both naturally  
143 expressed on the IE surface. We also included the merozoite antigen GLURP, which is not  
144 expressed on IE surface (Borre et al., 1991) (Fig. 1).

145 In line with our hypothesis suggesting that afucosylated IgG response is restricted to foreign  
146 antigens expressed on host cells (such as alloantigens and outer-membrane proteins of enveloped  
147 viruses (Kapur et al., 2014a; Kapur et al., 2015; Kapur et al., 2014b; Larsen et al., 2021; Sonneveld  
148 et al., 2017; Sonneveld et al., 2016)), IgG1-responses to VAR6 and VAR2CSA were markedly Fc  
149 afucosylated (Fig. 2A). All individuals showed lowered anti-VAR6 Fc fucosylation compared to  
150 total IgG1, which remained high. The magnitude of the decreased Fc fucosylation of VAR6-specific  
151 IgG1 exceeded any previously reported pathogen-derived immune response. The most similar  
152 responses are against rhesus D on red blood cells and human platelet antigen-1a on platelets.  
153 However, IgG1 responses to those antigens display big variation in Fc fucosylation ranging from  
154 almost 100% to 10% (Kapur et al., 2014a; Kapur et al., 2014b). In contrast, GLURP-specific IgG1  
155 Fc fucosylation was generally high, also in line with our hypothesis (Fig. 2A). A few women  
156 showed marked afucosylation of GLURP-specific IgG1 (Fig. 2A), possibly in response to GLURP  
157 deposited on the erythrocyte surface during invasion, as has been described for other merozoite-  
158 specific antigens (Awah et al., 2009). IgG1 specific for all three *P. falciparum* antigens showed  
159 higher Fc galactosylation and sialylation levels than total IgG1, similar to what is known for recent

160 immunizations (Larsen et al., 2021; Selman et al., 2012) (Supplementary Fig. 1A-B). Levels of  
161 bisecting GlcNAc were lower for VAR2CSA- and VAR6-specific IgG1, and higher for GLURP-  
162 specific IgG1 compared to total IgG1 (Supplementary Fig. 1C). These results indicate that antigen-  
163 specific IgG levels are modulated in complex ways according to exposure and antigen context.

164 Afucosylation of VAR2CSA-specific IgG1 was generally less pronounced than that of VAR6-  
165 specific IgG1 (Fig. 2A). Exposure to VAR2CSA-type PfEMP1 occurs later in life, as it is restricted  
166 to pregnancy, whereas *P. falciparum* expressing Group A PfEMP1 (such as VAR6) are associated  
167 with severe malaria in children (Jensen et al., 2004; Lennartz et al., 2017; Turner et al., 2013). IgG  
168 responses to Group A PfEMP1 variants are acquired from early in life in endemic areas through  
169 repeated exposure to parasites expressing those variants (Bull et al., 2000; Cham et al., 2009; Cham  
170 et al., 2010; Nielsen et al., 2002; Olsen et al., 2018). VAR6-specific IgG1 was consistently  
171 afucosylated in all tested individuals, probably as a result of continuous exposure to Group A  
172 PfEMP1 in childhood (Fig. 2A), indicating that afucosylation is a persistent phenotype once  
173 acquired. In contrast, the level of fucosylation of VAR2CSA-specific IgG1 was more varied  
174 (Fig. 2A) and decreased with increased antigen exposure, using parity as proxy (Fig. 2B). This was  
175 not the case for VAR6- (Fig. 2C) or GLURP-specific IgG1 (Fig. 2D), and only marginal for total  
176 plasma IgG1 (Fig. 2E).

### 177 ***Fc afucosylation of PfEMP1-specific IgG is stable***

178 The above findings support the hypothesis that afucosylated IgG specific for host membrane-  
179 associated immunogens is attained following repeated exposure and that the phenotype is stable  
180 once acquired. To examine this hypothesis further, and to consolidate the findings described above,  
181 we proceeded to determine the Fc fucosylation of IgG with specificity for the same three antigens,  
182 using an availability-based subset (N=72) of plasma samples from a previously published cohort of  
183 Ghanaian women sampled while not pregnant (Ampomah et al., 2014a). The findings regarding

184 total and antigen-specific IgG1 (Fig. 3 and Supplementary Fig. 1D-F) were fully consistent with  
185 those obtained with the samples from pregnant women. The marked Fc afucosylation of  
186 VAR2CSA- and VAR6-specific IgG1 was more pronounced among this second group of women  
187 (Fig. 3A), probably reflecting the more intense parasite transmission in the rainforest compared to  
188 the coastal savannah where the non-pregnant and pregnant women were recruited, respectively  
189 (Ampomah et al., 2014a; Ofori et al., 2009). Although VAR2CSA-specific IgG levels decay  
190 markedly within six months of delivery (Ampomah et al., 2014b; Staalsoe et al., 2001), the parity-  
191 dependency of the degree of VAR2CSA-specific IgG1 Fc afucosylation remained in these non-  
192 pregnant women (Fig. 3B). Furthermore, there was no significant correlation between the time since  
193 last pregnancy and Fc fucosylation levels of VAR2CSA-specific IgG1 (Fig. 3C). Taken together,  
194 these findings reinforce the inference that PfEMP1-specific IgG1 Fc afucosylation remains stable in  
195 the absence of exposure to antigen. This conclusion is in line with our previous findings regarding  
196 fucosylation of IgG1 alloantibodies being stable for >10 years (Kapur et al., 2015; Kapur et al.,  
197 2014b; Sonneveld et al., 2016). However, unlike the Fc afucosylation of PfEMP1-specific IgG1,  
198 which appeared to be exposure-dependent, boosting with alloantigens was found to have no  
199 apparent effect on the Fc fucosylation (Kapur et al., 2015; Kapur et al., 2014b; Sonneveld et al.,  
200 2016). It also suggests that in these cases, afucosylated IgG1 are secreted by long-lived plasma  
201 cells, which for VAR2CSA are sustained for up to a decade after the most recent exposure to  
202 parasites expressing VAR2CSA (Ampomah et al., 2014a). This stable response is similar to HIV-  
203 and cytomegalovirus-specific responses, but markedly different from initial SARS-CoV-2  
204 responses, which are in most patients only transiently afucosylated for a few weeks after  
205 seroconversion (Larsen et al., 2021). This may suggest that those antibodies were either secreted by  
206 short-lived plasma cells/plasmablasts, or that afucosylation in those cells is reprogrammed by  
207 particular inflammatory conditions.

208 ***Subunit VAR2CSA vaccination does not induce afucosylated IgG***

209       When measured at the time of delivery, high levels of IgG recognizing placenta-sequestering  
210 IEs are strongly associated with protection from adverse pregnancy outcome (Duffy and Fried,  
211 2003; Salanti et al., 2004; Staalsoe et al., 2004). Many of these antibodies interfere with placental  
212 IE sequestration (Fried et al., 1998; Ricke et al., 2000), and it is therefore generally assumed that  
213 neutralizing (adhesion-blocking) antibodies are required for clinical protection against PM (Beeson  
214 et al., 2004; Khunrae et al., 2010; Srivastava et al., 2010). On this basis, development of vaccines to  
215 prevent PM, based on the so-called minimal-binding-domain (MBD) of VAR2CSA (Clausen et al.,  
216 2012; Srivastava et al., 2011), is currently in progress (Mordmuller et al., 2019; Sirima et al., 2020).  
217 To examine the levels of Fc fucosylation of VAR2CSA-specific IgG following subunit vaccination,  
218 we tested plasma samples from the PAMVAC Phase 1 clinical trial, which involved adult  
219 volunteers without previous *P. falciparum* exposure, vaccinated with a recombinant VAR2CSA-  
220 MBD construct (Mordmuller et al., 2019). In contrast to the results obtained with naturally induced  
221 VAR2CSA-IgG1, the PAMVAC vaccination induced almost completely fucosylated IgG1, even  
222 significantly more fucosylated than total plasma IgG from the same donors (Fig. 4A and  
223 Supplementary Fig. 1G-I). This is in line with our recent comparison of naturally acquired and  
224 subunit vaccine-induced IgG1 specific for hepatitis B virus (Larsen et al., 2021). To assess the  
225 possibility that the full fucosylation of the vaccine-induced VAR2CSA-specific IgG was due to the  
226 vaccinees' lack of previous exposure to *P. falciparum*, genetics, or other environmental parameters,  
227 we also tested samples obtained from the parallel trial of the PAMVAC vaccine in Beninese  
228 nulligravidae, who were therefore unexposed to VAR2CSA despite lifelong *P. falciparum*  
229 exposure. The results (Fig. 4B and Supplementary Fig. 1J-L) were essentially identical to those  
230 obtained with unexposed volunteers. Similar to the Ghanaian cohorts described above, the Beninese  
231 cohort had lower Fc fucosylation levels of total plasma IgG compared to previous reports of

232 European cohorts and the unexposed vaccine cohort consisting of Europeans, reaffirming previous  
233 reports from rural areas (de Jong et al., 2016). This is likely due to accumulating afucosylated IgG  
234 to both *P. falciparum* membrane antigens and enveloped viruses (de Haan et al., 2016; Larsen et al.,  
235 2021).

### 236 ***Only afucosylated VAR2CSA-specific IgG induces natural killer cell degranulation***

237 Afucosylation of IgG Fc improves the affinity of IgG for Fc $\gamma$ RIII (Dekkers et al., 2017;  
238 Ferrara et al., 2011), increasing NK-cell mediated ADCC against IgG-opsonized targets (Temming  
239 et al., 2019). Recently it was reported that IgG from individuals naturally exposed to *P. falciparum*  
240 makes IEs susceptible to NK-cell mediated ADCC, and that PfEMP1-specific IgG is a major  
241 contributor to this response (Arora et al., 2018). To investigate the functional importance of  
242 afucosylation of PfEMP1-specific IgG for ADCC, we assessed the ten Ghanaian plasma samples  
243 with the highest and lowest Fc fucosylation of VAR2CSA-specific IgG, respectively, for NK cell  
244 degranulation efficiency. The samples had a similar distribution of VAR2CSA-specific IgG levels  
245 (Fig. 5A). However, they differed markedly in their ability to induce NK-cell ADCC, assessed by  
246 degranulation-induced expression of CD107a (Fig. 5B) (Snyder et al., 2018). Only VAR2CSA-  
247 specific IgG from individuals with low VAR2CSA-specific Fc fucosylation induced NK-cell  
248 degranulation, whereas IgG from individual with high VAR2CSA-specific Fc fucosylation was less  
249 effective (Fig. 5B). In line with earlier work (Dekkers et al., 2017; Temming et al., 2019), the  
250 fucosylation status of these antibody proved to be a more important predictor of NK-cell mediated  
251 activity than their quantity (Fig. 5A). To consolidate these results and to directly compare Fc  
252 fucosylation, we next assayed recombinant fucosylation variants of the VAR2CSA-specific human  
253 monoclonal antibody PAM1.4. Whereas both bound similarly in ELISA (Fig. 5C), only the  
254 afucosylated PAM1.4 induced marked NK-cell degranulation (Fig. 5D). Together, these findings  
255 underscore the functional significance of Fc afucosylation of PfEMP1-specific IgG, indicating that

256 IgG induced by PfEMP1 protein subunit vaccination lack potentially important characteristics of the  
257 naturally acquired antibody response.

## 258 ***Conclusion***

259 Our study supports the hypothesis that the immune system has evolved a capacity to  
260 selectively modulate the glycosylation pattern of the IgG Fc region, thereby fine-tuning the effector  
261 response triggered by antibody-opsonized targets (Larsen et al., 2021). Specifically, it appears that  
262 immunogens expressed on host membranes induce afucosylated IgG, thereby increasing its ability  
263 to elicit Fc $\gamma$ RIII-dependent effector responses such as ADCC. In contrast, immunogens in solution  
264 or present on the surface of pathogens seem to mainly induce fucosylated IgG, thus steering the  
265 effector response against IgG-opsonized targets towards other Fc $\gamma$ R-dependent effector functions.  
266 The plasticity in human immune responses to modulate IgG effector functions by altered  
267 fucosylation endows the immune system with a so far largely unappreciated level of adaptability.  
268 While it is congruent with the current understanding of how the immune system works, the  
269 functional importance of afucosylated IgG in malaria remains to be demonstrated, which future  
270 studies will strive to elucidate. In the meantime, it should be emphasized that the decrease in Fc  
271 fucosylation reported here exceeds any that has previously been reported for pathogen-derived  
272 antigens. Indeed, it also surpasses the clinically significant afucosylation of the IgG response to  
273 alloantigens (Kapur et al., 2014a; Kapur et al., 2014b; Wuhrer et al., 2009), thus, implying that the  
274 immunopathogenic IgG raised in these instances is an unfortunate mimic of an evolutionary  
275 conserved and advantageous immune mechanism against intracellular pathogens. Finally, the data  
276 suggest that to induce afucosylated IgG responses with increased ADCC – and potentially  
277 protective capacity, alternative vaccination strategies are required, mimicking the expression of  
278 antigens on host cells.

## 279 **Materials and methods**

### 280 *Human subjects*

281 We used biological samples collected as part of the following studies: (i) A longitudinal study  
282 of malaria in pregnancy, conducted in Dodowa, located in a coastal savannah area with stable,  
283 seasonal *P. falciparum* transmission, approximately 40 km North of Accra, Ghana (Ofori et al.,  
284 2009). (ii) A cross-sectional study of immune responses to VAR2CSA in healthy non-pregnant  
285 women (Ampomah et al., 2014a), conducted in Assin Foso, in a rainforest area with high and  
286 perennial *P. falciparum* transmission, located approximately 80 km North of Cape Coast, Ghana  
287 (Afari et al., 1995). (iii) A phase 1 clinical trial of the VAR2CSA-based PAMVAC vaccine,  
288 conducted in non-immune German volunteers and in adult, nulligravid *P. falciparum*-exposed  
289 Beninese women volunteers (Mordmuller et al., 2019). Healthy blood donor samples from Sanquin,  
290 Amsterdam, The Netherlands, were used as negative control donors.

291 The Ghanaian donors all had serologic evidence of exposure to *P. falciparum*, with  
292 seropositivity rates above 90% in the non-pregnant cohort (Ampomah et al., 2014a) and above 70%  
293 in the pregnant cohort (Data not shown).

294 A more detailed demographic description of the analyzed cohorts can be found in the  
295 supplementary materials (Supplementary table 1).

### 296 ***P. falciparum recombinant antigens***

297 The full-length ectodomains of the VAR2CSA-type PfEMP1 antigen IT4VAR04  
298 (VAR2CSA) and of the Group A PfEMP1 antigen HB3VAR6 (VAR6) were expressed in  
299 baculovirus-infected insect cells and purified as described previously (Khunrae et al., 2010;  
300 Stevenson et al., 2015). The amino-terminal, non-repetitive R0 region of glutamate-rich protein

301 (GLURP) was expressed in *Escherichia coli* and purified as described elsewhere (Theisen et al.,  
302 1995).

### 303 ***Purification of IgG from plasma samples***

304 Total IgG from individual donors was purified from ~1  $\mu$ L plasma using the AssayMAP  
305 Bravo platform (Agilent Technologies, Santa Clara, USA) with Protein G-coupled cartridges as  
306 described elsewhere (Larsen et al., 2021).

307 *P. falciparum* antigen-specific IgG was purified from individual donors by incubation (1h,  
308 room temperature) of individual plasma samples (diluted 1:10 in phosphate-buffered saline (PBS)  
309 supplemented with TWEEN 20 (0.05 %; PBS-T)) in 96-well Maxisorp plates (Nunc, Roskilde,  
310 Denmark) coated overnight (4°C; PBS) with VAR2CSA (2  $\mu$ g/mL), VAR6 (2  $\mu$ g/mL), or GLURP  
311 (1  $\mu$ g/mL). Following the incubation, the plates were washed 3 $\times$  with PBS-T, 2 $\times$  with PBS, and 2 $\times$   
312 with ammonium bicarbonate (50 mM). Antigen-specific IgG were finally eluted by formic acid  
313 (100 mM; 5 min shaking).

### 314 ***Mass spectrometric IgG Fc glycosylation analysis***

315 Eluates of purified IgG were collected in low-binding PCR plates (Eppendorf, Hamburg,  
316 Germany) and dried by vacuum centrifugation (50°C). The dried samples were dissolved in a  
317 reduction and alkylation buffer containing sodium deoxycholate (0.4%), tris(2-  
318 carboxyethyl)phosphine (10 mM), 2-chloroacetamide (40mM), and TRIS (pH8.5; 100 mM), or  
319 ammonium bicarbonate (50 mM). After boiling the samples (10 min; 95°C), trypsin (5  $\mu$ g/mL) in  
320 ammonium bicarbonate (50 mM) was added. The digestion was terminated after overnight  
321 incubation (37°C) by acidifying to a final concentration of 2% formic acid. Prior to mass  
322 spectrometry injection, sodium deoxycholate precipitates, in samples where this was added, were



323 removed by centrifugation (3,000×g; 30 min), and filtering through 0.65 µm low protein binding  
324 filter plates (Millipore, Burlington, USA).

325 Analysis of IgG Fc glycosylation was performed with nanoLC reverse phase-electrospray-  
326 mass spectrometry on an Impact HD quadrupole-time-of-flight mass spectrometer (Bruker  
327 Daltonics, Bremen, Germany) and data was processed with Skyline software as described elsewhere  
328 (Larsen et al., 2021). The level of fucosylation and bisection were calculated as the sum of the  
329 relative intensities of glycoforms containing the respective glycotraits. Galactosylation and  
330 sialylation levels were calculated as antenna occupancy. The relative intensities of the glycoforms  
331 were summed with mono-galactosylated/sialylated species only contributing with 50 % of their  
332 relative intensity.

### 333 ***Human monoclonal VAR2CSA-specific IgG***

334 The human monoclonal IgG1 antibody, PAM1.4, derived from an EBV-immortalized  
335 memory B-cell clone from a Ghanaian woman with natural exposure to PM (Barfod et al., 2007),  
336 recognizes a conformational epitope in several VAR2CSA-type PfEMP1 proteins, including  
337 IT4VAR04. In the present study, we used a non-modified recombinant version of PAM1.4  
338 produced in HEK293F cells with high Fc fucosylation and a glyco-engineered variant with low Fc  
339 fucosylation (Dekkers et al., 2016; Larsen et al., 2019).

### 340 ***Quantification of VAR2CSA-specific IgG***

341 Levels of VAR2CSA-specific IgG were assessed by ELISA as previously described (Lopez-  
342 Perez et al., 2018). In brief, 96-well flat-bottom microtiter plates (Nunc MaxiSorp, Thermo Fisher  
343 Scientific) were coated overnight at 4°C with full-length VAR2CSA (100 ng/well in PBS.  
344 Monoclonal antibody (0.08 to 10 µg/mL) or plasma samples (1:400) were added in duplicate,  
345 followed by washing and horseradish peroxidase-conjugated rabbit anti-human IgG (1:3,000;

346 Dako). Bound antibodies were detected by adding TMB PLUS2 (Eco-Tek), and the reaction  
347 stopped by the addition of 0.2 M H<sub>2</sub>SO<sub>4</sub>. The optical density (OD) was read at 450 nm and the  
348 specific antibody levels were calculated in arbitrary units (AU), using the equation  
349  $100 \times [(OD_{\text{SAMPLE}} - OD_{\text{BLANK}}) / (OD_{\text{POS. CTRL}} - OD_{\text{BLANK}})]$ .

### 350 *Antibody-dependent cellular cytotoxicity (ADCC) assay*

351 Degranulation-induced CD107a expression in response to IgG bound to plastic-immobilized  
352 antigen is a convenient marker of NK-cell ADCC (Jegaskanda et al., 2013). Here, we coated 96-  
353 well flat-bottom microtiter plates (Nunc MaxiSorp; Thermo Fisher Scientific) overnight at 4°C with  
354 full-length VAR2CSA (100 ng/well in PBS; (Lopez-Perez et al., 2018)). Following 1h blocking with  
355 PBS containing 1% Ig-free bovine serum albumin-BSA (1% PBS-BSA), plasma samples (1:20) or  
356 PAM1.4 variants (0.08 to 10 µg/mL) were added for 1h at 37°C. After washing,  $1.6 \times 10^5$  NK92  
357 cells stably expressing CD16a and GFP (Snyder et al., 2018) were added to each well. In addition,  
358 anti-human CD107a-PE (H4A3 clone; BD Biosciences), 10 µg/mL brefeldin A (Sigma-Aldrich),  
359 and 2 µM monensin (Sigma-Aldrich) were added, and the cells incubated for 4 h at 37°C. Cells  
360 were then centrifuged and stained with near-IR fixable Live/Dead dye (Invitrogen), followed by  
361 data acquisition on a FACS LSRII flow cytometer (BD Biosciences), and analysis with FlowLogic  
362 software (Inivai Technologies, Australia). Wells with antigen and NK cells, but without antibody  
363 were included in all experiments to control for unspecific activation. Plasma samples from four  
364 Danish non-pregnant women without malaria exposure and purified human IgG (Sigma-Aldrich)  
365 were included as negative controls.

### 366 *Statistical tests*

367 Statistical analyses were performed using R: A Language and Environment for Statistical  
368 Computing (Version 3.5.2). Performed tests are mentioned in the text.

369 ***Ethics statement***

370           Collection of biological samples for this study was approved by the Institutional Review  
371 Board of Noguchi Memorial Institute for Medical Research, University of Ghana (study 038/10-11),  
372 by the Regional Research Ethics Committees, Capital Region of Denmark (protocol H-4-2013-083),  
373 by the Academic Medical Center Institutional Medical Ethics Committee of the University of  
374 Amsterdam, by the Ethics Committee of the Medical Faculty and the University Clinics of the  
375 University of Tübingen, and by the German Regulatory authorities. The study was conducted in  
376 adherence with the International Council for Technical Requirements for Human Use guidelines  
377 and the principles of the Declaration of Helsinki. Written informed consent was obtained from all  
378 participants before enrollment.

379 **Author contributions**

380 Conceptualization: MDL, CEvdS, LH, GV

381 Funding acquisition: MFO, LH, GV

382 Investigation: MDL, MLP, JN, MW, LH, GV

383 Study materials: EKD, PA, BM, AS, MAN, MFO, NTN, AM

384 Writing – original draft: MDL, LH, GV

385 Writing – review & editing: All.

## 386 **Acknowledgments**

387 We are grateful to all the individuals donating blood samples for this study, and to the  
388 scientists and health workers participating in the studies for which they were originally collected.

389 We thank Michael Theisen (University of Copenhagen and Statens Seruminstitut) for GLURP  
390 antigen and GLURP-reactive IgG preparation, and Bruce Walcheck and Geoff Hart (University of  
391 Minnesota) for the NK92-CD16a cell line. We also acknowledge Erik de Graaf (Sanquin Research)  
392 for optimization of the analysis pipelines used in this study, done in relation to previous projects.

393 The study was funded by the Landsteiner Foundation for Blood Transfusion Research grant  
394 number 1721 and the Danish International Development Agency (Danida), 12-081RH and  
395 17-02-KU). The PAMVAC study (ClinicalTrials.gov ID NCT02647489) was sponsored by the  
396 Universitätsklinikum Tübingen and funded by the European Union Seventh Framework Programme  
397 (FP7-HEALTH-2012-INNOVATION; under grant agreement 304815), the Danish Advanced  
398 Technology Foundation (under grant number 005-2011-1), and a Medium Scale Collaborative  
399 Project supported by the German Federal Ministry of Education and Research (Bundesministerium  
400 für Bildung und Forschung) through EVI, KfW, and Irish Aid. The funders had no role in study  
401 design, data collection and analysis, decision to publish, or preparation of the manuscript.

402 Conflicts of interest. The authors declare no competing financial interests OR (If potential  
403 conflicts are listed). The authors have no additional financial interests.

## 404 **References**

- 405 Ackerman, M.E., M. Crispin, X. Yu, K. Baruah, A.W. Boesch, D.J. Harvey, A.S. Dugast, E.L.  
406 Heizen, A. Ercan, I. Choi, H. Streeck, P.A. Nigrovic, C. Bailey-Kellogg, C. Scanlan, and G.  
407 Alter. 2013. Natural variation in Fc glycosylation of HIV-specific antibodies impacts antiviral  
408 activity. *J Clin Invest* 123:2183-2192.
- 409 Afari, E.A., M. Appawu, S. Dunyo, A. Baffoe-Wilmot, and F.K. Nkrumah. 1995. Malaria infection,  
410 morbidity and transmission in two ecological zones in southern Ghana. *African Journal of*  
411 *Health Sciences* 2:312-316.
- 412 Ampomah, P., L. Stevenson, M.F. Ofori, L. Barfod, and L. Hviid. 2014a. B-cell responses to  
413 pregnancy-restricted and -unrestricted *Plasmodium falciparum* erythrocyte membrane protein  
414 1 antigens in Ghanaian women naturally exposed to malaria parasites. *Infect Immun* 82:1860-  
415 1871.
- 416 Ampomah, P., L. Stevenson, M.F. Ofori, L. Barfod, and L. Hviid. 2014b. Kinetics of B cell  
417 responses to *Plasmodium falciparum* erythrocyte membrane protein 1 in Ghanaian women  
418 naturally exposed to malaria parasites. *J Immunol* 192:5236-5244.
- 419 Arora, G., G.T. Hart, J. Manzella-Lapeira, J.Y. Doritchamou, D.L. Narum, L.M. Thomas, J.  
420 Brzostowski, S. Rajagopalan, O.K. Doumbo, B. Traore, L.H. Miller, S.K. Pierce, P.E. Duffy,  
421 P.D. Crompton, S.A. Desai, and E.O. Long. 2018. NK cells inhibit *Plasmodium falciparum*  
422 growth in red blood cells via antibody-dependent cellular cytotoxicity. *Elife* 7:e36806.
- 423 Ataide, R., V. Mwapasa, M.E. Molyneux, S.R. Meshnick, and S.J. Rogerson. 2011. Antibodies that  
424 induce phagocytosis of malaria infected erythrocytes: effect of HIV infection and correlation  
425 with clinical outcomes. *PLoS One* 6:e22491.

426 Awah, N.W., M. Troye-Blomberg, K. Berzins, and J. Gysin. 2009. Mechanisms of malarial  
427 anaemia: potential involvement of the *Plasmodium falciparum* low molecular weight rhoptry-  
428 associated proteins. *Acta Trop* 112:295-302.

429 Bakovic, M.P., M.H. Selman, M. Hoffmann, I. Rudan, H. Campbell, A.M. Deelder, G. Lauc, and  
430 M. Wuhrer. 2013. High-throughput IgG Fc N-glycosylation profiling by mass spectrometry of  
431 glycopeptides. *J Proteome Res* 12:821-831.

432 Barfod, L., N.L. Bernasconi, M. Dahlbäck, D. Jarrossay, P.H. Andersen, A. Salanti, M.F. Ofori, L.  
433 Turner, M. Resende, M.A. Nielsen, T.G. Theander, F. Sallusto, A. Lanzavecchia, and L.  
434 Hviid. 2007. Human pregnancy-associated malaria-specific B cells target polymorphic,  
435 conformational epitopes in VAR2CSA. *Mol Microbiol* 63:335-347.

436 Barfod, L., T. Dobrilovic, P. Magistrado, P. Khunrae, F. Viwami, J. Bruun, M. Dahlbäck, N.L.  
437 Bernasconi, M. Fried, D. John, P.E. Duffy, A. Salanti, A. Lanzavecchia, C.T. Lim, N.T.  
438 Ndam, M.K. Higgins, and L. Hviid. 2010. Chondroitin sulfate A-adhering *Plasmodium*  
439 *falciparum*-infected erythrocytes express functionally important antibody epitopes shared by  
440 multiple variants. *J Immunol* 185:7553-7561.

441 Beeson, J.G., E.J. Mann, S.R. Elliott, V.M. Lema, E. Tadesse, M.E. Molyneux, G.V. Brown, and  
442 S.J. Rogerson. 2004. Antibodies to variant surface antigens of *Plasmodium falciparum*-  
443 infected erythrocytes and adhesion inhibitory antibodies are associated with placental malaria  
444 and have overlapping and distinct targets. *J Infect Dis* 189:540-551.

445 Bengtsson, A., L. Joergensen, T.S. Rask, R.W. Olsen, M.A. Andersen, L. Turner, T. Theander, L.  
446 Hviid, M.K. Higgins, A. Craig, A. Brown, and A.T.R. Jensen. 2013. A novel domain cassette  
447 identifies *Plasmodium falciparum*

448 PfEMP1 proteins binding ICAM-1 and is a target of

449 cross-reactive, adhesion-inhibitory antibodies. *J Immunol* 190:240-249.

- 450 Borre, M.B., M. Dziegiel, B. Høgh, E. Petersen, K. Rieneck, E. Riley, J.F. Meis, M. Aikawa, K.  
451 Nakamura, M. Harada, A. Wind, P.H. Jakobsen, J. Cowland, S. Jepsen, N.H. Axelsen, and J.  
452 Juust. 1991. Primary structure and localization of a conserved immunogenic *Plasmodium*  
453 *falciparum* glutamate rich protein (GLURP) expressed in both the preerythrocytic and  
454 erythrocytic stages of the vertebrate lifecycle. *Mol Biochem Parasitol* 49:119-132.
- 455 Bull, P.C., M. Kortok, O. Kai, F. Ndungu, A. Ross, B.S. Lowe, C.I. Newbold, and K. Marsh. 2000.  
456 *Plasmodium falciparum*-infected erythrocytes: agglutination by diverse Kenyan plasma is  
457 associated with severe disease and young host age. *J Infect Dis* 182:252-259.
- 458 Chakraborty, S., J. Gonzalez, K. Edwards, V. Mallajosyula, A.S. Buzzanco, R. Sherwood, C.  
459 Buffone, N. Kathale, S. Providenza, M.M. Xie, J.R. Andrews, C.A. Blish, U. Singh, H.  
460 Dugan, P.C. Wilson, T.D. Pham, S.D. Boyd, K.C. Nadeau, B.A. Pinsky, Z. S., M.J. Memoli,  
461 J.K. Taubenberger, T. Morales, J.M. Schapiro, G.S. Tan, P. Jagannathan, and T.T. Wang.  
462 2021. Proinflammatory IgG Fc structures in patients with severe COVID-19. *Nat Immunol*  
463 22:67-73.
- 464 Cham, C.K., L. Turner, J. Lusingu, L. Vestergaard, B. Mmbando, J.D. Kurtis, A.T. Jensen, A.  
465 Salanti, T. Lavstsen, and T.G. Theander. 2009. Sequential, ordered acquisition of antibodies  
466 to *Plasmodium falciparum* erythrocyte membrane protein 1 domains. *J Immunol* 183:3356-  
467 3363.
- 468 Cham, G.K., L. Turner, J.D. Kurtis, T. Mutabingwa, M. Fried, A.T. Jensen, T. Lavstsen, L. Hviid,  
469 P.E. Duffy, and T.G. Theander. 2010. Hierarchical, domain type-specific acquisition of  
470 antibodies to *Plasmodium falciparum* erythrocyte membrane protein 1 in Tanzanian children.  
471 *Infect Immun* 78:4653-4659.
- 472 Clausen, T.M., S. Christoffersen, M. Dahlback, A.E. Langkilde, K.E. Jensen, M. Resende, M.O.  
473 Agerbak, D. Andersen, B. Berisha, S.B. Ditlev, V.V. Pinto, M.A. Nielsen, T.G. Theander, S.



474 Larsen, and A. Salanti. 2012. Structural and functional insight into how the *Plasmodium*  
475 *falciparum* VAR2CSA protein mediates binding to chondroitin sulfate A in placental malaria.  
476 *J Biol Chem* 287:23332-23345.

477 Cohen, S., I.A. McGregor, and S. Carrington. 1961. Gammaglobulin and acquired immunity to  
478 human malaria. *Nature* 192:733-737.

479 Conway, D.J., D.R. Cavanagh, K. Tanabe, C. Roper, Z.S. Mikes, N. Sakihama, K.A. Bojang, A.M.  
480 Oduola, P.G. Kremsner, D.E. Arnot, B.M. Greenwood, and J.S. McBride. 2000. A principal  
481 target of human immunity to malaria identified by molecular population genetic and  
482 immunological analyses. *Nat Med* 6:689-692.

483 de Haan, N., K.R. Reiding, G. Driessen, M. van der Burg, and M. Wuhrer. 2016. Changes in  
484 healthy human IgG Fc-glycosylation after birth and during early childhood. *J Proteome Res*  
485 15:1853-1861.

486 de Jong, S.E., M.H. Selman, A.A. Adegnik, A.S. Amoah, E. van Riet, Y.C. Kruize, J.G. Raynes,  
487 A. Rodriguez, D. Boakye, E. von Mutius, A.C. Knulst, J. Genuneit, P.J. Cooper, C.H. Hokke,  
488 M. Wuhrer, and M. Yazdanbakhsh. 2016. IgG1 Fc N-glycan galactosylation as a biomarker  
489 for immune activation. *Sci Rep* 6:28207.

490 Dekkers, G., R. Plomp, C.A.M. Koeleman, R. Visser, H.H. von Horsten, V. Sandig, T. Rispens, M.  
491 Wuhrer, and G. Vidarsson. 2016. Multi-level glyco-engineering techniques to generate IgG  
492 with defined Fc-glycans. *Sci Rep* 6:36964.

493 Dekkers, G., L. Treffers, R. Plomp, A.E.H. Bentlage, M. de Boer, C.A.M. Koeleman, S.N.  
494 Lissenberg-Thunnissen, R. Visser, M. Brouwer, J.Y. Mok, H. Matlung, T.K. van den Berg,  
495 W.J.E. van Esch, T.W. Kuijpers, D. Wouters, T. Rispens, M. Wuhrer, and G. Vidarsson.  
496 2017. Decoding the human immunoglobulin G-glycan repertoire reveals a spectrum of Fc-  
497 receptor- and complement-mediated-effector activities. *Front Immunol* 8:877.

- 498 Douglas, A.D., A.R. Williams, J.J. Illingworth, G. Kamuyu, S. Biswas, A.L. Goodman, D.H.  
499 Wyllie, C. Crosnier, K. Miura, G.J. Wright, C.A. Long, F.H. Osier, K. Marsh, A.V. Turner,  
500 A.V. Hill, and S.J. Draper. 2011. The blood-stage malaria antigen PfRH5 is susceptible to  
501 vaccine-inducible cross-strain neutralizing antibody. *Nat Commun* 2:601.
- 502 Duffy, M.F., A.G. Maier, T.J. Byrne, A.J. Marty, S.R. Elliott, M.T. O'Neill, P.D. Payne, S.J.  
503 Rogerson, A.F. Cowman, B.S. Crabb, and G.V. Brown. 2006. VAR2CSA is the principal  
504 ligand for chondroitin sulfate A in two allogeneic isolates of *Plasmodium falciparum*.  
505 *Molecular and Biochemical Parasitology* 148:117-124.
- 506 Duffy, P.E., and M. Fried. 2003. Antibodies that inhibit *Plasmodium falciparum* adhesion to  
507 chondroitin sulfate A are associated with increased birth weight and the gestational age of  
508 newborns. *Infect Immun* 71:6620-6623.
- 509 Ferrara, C., S. Grau, C. Jager, P. Sondermann, P. Brunker, I. Waldhauer, M. Hennig, A. Ruf, A.C.  
510 Rufer, M. Stihle, P. Umana, and J. Benz. 2011. Unique carbohydrate-carbohydrate  
511 interactions are required for high affinity binding between FcγRIII and antibodies lacking  
512 core fucose. *Proc Natl Acad Sci U S A* 108:12669-12674.
- 513 Fried, M., and P.E. Duffy. 1996. Adherence of *Plasmodium falciparum* to chondroitin sulphate A in  
514 the human placenta. *Science* 272:1502-1504.
- 515 Fried, M., F. Nosten, A. Brockman, B.T. Brabin, and P.E. Duffy. 1998. Maternal antibodies block  
516 malaria. *Nature* 395:851-852.
- 517 Hviid, L., and A.T. Jensen. 2015. PfEMP1 - A parasite protein family of key importance in  
518 *Plasmodium falciparum* malaria immunity and pathogenesis. *Advances in Parasitology* 88:51-  
519 84.
- 520 Jegaskanda, S., E.R. Job, M. Kramski, K. Laurie, G. Isitman, R. de Rose, W.R. Winnall, I. Stratov,  
521 A.G. Brooks, P.C. Reading, and S.J. Kent. 2013. Cross-reactive influenza-specific antibody-

522 dependent cellular cytotoxicity antibodies in the absence of neutralizing antibodies. *J*  
523 *Immunol* 190:1837-1848.

524 Jensen, A.R., Y. Adams, and L. Hviid. 2020. Cerebral *Plasmodium falciparum* malaria: The role of  
525 PfEMP1 in its pathogenesis and immunity, and PfEMP1-based vaccines to prevent it.  
526 *Immunol Rev* 293:230-252.

527 Jensen, A.T.R., P.A. Magistrado, S. Sharp, L. Joergensen, T. Lavstsen, A. Chiucciuni, A. Salanti,  
528 L.S. Vestergaard, J.P. Lusingu, R. Hermsen, R. Sauerwein, J. Christensen, M.A. Nielsen, L.  
529 Hviid, C. Sutherland, T. Staalsoe, and T.G. Theander. 2004. *Plasmodium falciparum*  
530 associated with severe childhood malaria preferentially expresses PfEMP1 encoded by Group  
531 *A var* genes. *J Exp Med* 199:1179-1190.

532 Kana, I.H., B. Adu, R.W. Tiendrebeogo, S.K. Singh, D. Doodoo, and M. Theisen. 2017. Naturally  
533 acquired antibodies target the glutamate-rich protein on intact merozoites and predict  
534 protection against febrile malaria. *J Infect Dis* 215:623-630.

535 Kapur, R., L. Della Valle, M. Sonneveld, A. Hipgrave Ederveen, R. Visser, P. Ligthart, M. de Haas,  
536 M. Wuhrer, C.E. van der Schoot, and G. Vidarsson. 2014a. Low anti-RhD IgG-Fc-  
537 fucosylation in pregnancy: a new variable predicting severity in haemolytic disease of the  
538 fetus and newborn. *Br J Haematol* 166:936-945.

539 Kapur, R., L. Della Valle, O.J. Verhagen, A. Hipgrave Ederveen, P. Ligthart, M. de Haas, B.  
540 Kumpel, M. Wuhrer, C.E. van der Schoot, and G. Vidarsson. 2015. Prophylactic anti-D  
541 preparations display variable decreases in Fc-fucosylation of anti-D. *Transfusion* 55:553-562.

542 Kapur, R., I. Kustiawan, A. Vestrheim, C.A. Koeleman, R. Visser, H.K. Einarsdottir, L. Porcelijn,  
543 D. Jackson, B. Kumpel, A.M. Deelder, D. Blank, B. Skogen, M.K. Killie, T.E. Michaelsen,  
544 M. de Haas, T. Rispens, C.E. van der Schoot, M. Wuhrer, and G. Vidarsson. 2014b. A

545 prominent lack of IgG1-Fc fucosylation of platelet alloantibodies in pregnancy. *Blood*  
546 123:471-480.

547 Khunrae, P., M. Dahlbäck, M.A. Nielsen, G. Andersen, S.B. Ditlev, M. Resende, V.V. Pinto, T.G.  
548 Theander, M.K. Higgins, and A. Salanti. 2010. Full-length recombinant *Plasmodium*  
549 *falciparum* VAR2CSA binds specifically to CSPG and induces potent parasite adhesion-  
550 blocking antibodies. *J Mol Biol* 397:826-834.

551 Larsen, M.D., E.L. de Graaf, M.E. Sonneveld, H.R. Plomp, J. Nouta, W. Hoepel, H.J. Chen, F.  
552 Linty, R. Visser, M. Brinkhaus, T. Sustic, S.W. de Taeye, A.E.H. Bentlage, S. Toivonen,  
553 C.A.M. Koeleman, S. Sainio, N.A. Kootstra, P.J.M. Brouwer, C.E. Geyer, N.I.L. Derksen, G.  
554 Wolbink, M. de Winther, R.W. Sanders, M.J. van Gils, S. de Bruin, A.P.J. Vlaar, U.M.C.C.-  
555 b.s.g. Amsterdam, T. Rispens, J. den Dunnen, H.L. Zaaijer, M. Wuhrer, C. Ellen van der  
556 Schoot, and G. Vidarsson. 2021. Afucosylated IgG characterizes enveloped viral responses  
557 and correlates with COVID-19 severity. *Science* 371:eabc8378.

558 Larsen, M.D., M.D.P. Quintana, S.B. Ditlev, R. Bayarri-Olmos, M.F. Ofori, L. Hviid, and P.  
559 Garred. 2019. Evasion of classical complement pathway activation on *Plasmodium*  
560 *falciparum*-infected erythrocytes opsonized by PfEMP1-specific IgG. *Front Immunol* 9:3088.

561 Lennartz, F., Y. Adams, A. Bengtsson, R.W. Olsen, L. Turner, N.T. Ndam, G. Ecklu-Mensah, A.  
562 Moussiliou, M.F. Ofori, B. Gamain, J.P. Lusingu, J.E. Petersen, C.W. Wang, S. Nunes-Silva,  
563 J.S. Jespersen, C.K. Lau, T.G. Theander, T. Lavstsen, L. Hviid, M.K. Higgins, and A.T.  
564 Jensen. 2017. Structure-guided identification of a family of dual receptor-binding PfEMP1  
565 that is associated with cerebral malaria. *Cell Host Microbe* 21:403-414.

566 Lopez-Perez, M., M.D. Larsen, R. Bayarri-Olmos, P. Ampomah, L. Stevenson, M. Arévalo-  
567 Herrera, S. Herrera, and L. Hviid. 2018. IgG responses to the *Plasmodium falciparum* antigen

568 VAR2CSA in Colombia are restricted to pregnancy and are not induced by exposure to  
569 *Plasmodium vivax*. *Infect Immun* 86:e00136-00118.

570 Marsh, K., L. Otoo, R.J. Hayes, D.C. Carson, and B.M. Greenwood. 1989. Antibodies to blood  
571 stage antigens of *Plasmodium falciparum* in rural Gambians and their relation to protection  
572 against infection. *Transactions of the Royal Society for Tropical Medicine and Hygiene*  
573 83:293-303.

574 Megnekou, R., T. Staalsoe, D.W. Taylor, R. Leke, and L. Hviid. 2005. Effects of pregnancy and  
575 intensity of *Plasmodium falciparum* transmission on immunoglobulin G subclass responses to  
576 variant surface antigens. *Infect Immun* 73:4112-4118.

577 Mordmuller, B., M. Sulyok, D. Egger-Adam, M. Resende, W.A. de Jongh, M.H. Jensen, H.H.  
578 Smedegaard, S.B. Ditlev, M. Soegaard, L. Poulsen, C. Dyring, C.L. Calle, A. Knoblich, J.  
579 Ibanez, M. Esen, P. Deloron, N. Ndam, S. Issifou, S. Houard, R.F. Howard, S.G. Reed, O.  
580 Leroy, A.J.F. Luty, T.G. Theander, P.G. Kreamsner, A. Salanti, and M.A. Nielsen. 2019. First-  
581 in-human, randomized, double-blind clinical trial of differentially adjuvanted PAMVAC, a  
582 vaccine candidate to prevent pregnancy-associated malaria. *Clin Infect Dis* 69:1509-1516.

583 Nielsen, M.A., T. Staalsoe, J.A.L. Kurtzhals, B.Q. Goka, D. Dodoo, M. Alifrangis, T.G. Theander,  
584 B.D. Akanmori, and L. Hviid. 2002. *Plasmodium falciparum* variant surface antigen  
585 expression varies between isolates causing severe and non-severe malaria and is modified by  
586 acquired immunity. *J Immunol* 168:3444-3450.

587 Ofori, M., E. Ansah, I. Agyepong, D. Ofori-Adjei, L. Hviid, and B. Akanmori. 2009. Pregnancy-  
588 associated malaria in a rural community of Ghana. *Ghana Med J* 43:13-18.

589 Ofori, M.F., H. Lamptey, E.K. Dickson, E. Kyei-Baafour, and L. Hviid. 2018. Etiology of Placental  
590 *Plasmodium falciparum* Malaria in African Women. *J Infect Dis* 218:277-281.

- 591 Olsen, R.W., G. Ecklu-Mensah, A. Bengtsson, M.F. Ofori, J.P.A. Lusingu, F.C. Castberg, L. Hviid,  
592 Y. Adams, and A.T.R. Jensen. 2018. Natural and vaccine-induced acquisition of cross-  
593 reactive IgG-inhibiting ICAM-1-specific binding of a *Plasmodium falciparum* PfEMP1  
594 subtype associated specifically with cerebral malaria. *Infect Immun* 86:e00622-00617.
- 595 Piper, K.P., D.J. Roberts, and K.P. Day. 1999. *Plasmodium falciparum*: analysis of the antibody  
596 specificity to the surface of the trophozoite-infected erythrocyte. *Experimental Parasitology*  
597 91:161-169.
- 598 Ravetch, J.V., and B. Perussia. 1989. Alternative membrane forms of FcγRIII (CD16) on human  
599 natural killer cells and neutrophils. Cell type-specific expression of two genes that differ in  
600 single nucleotide substitutions. *J Exp Med* 170:481-497.
- 601 Ricke, C.H., T. Staalsoe, K. Koram, B.D. Akanmori, E.M. Riley, T.G. Theander, and L. Hviid.  
602 2000. Plasma antibodies from malaria-exposed pregnant women recognize variant surface  
603 antigens on *Plasmodium falciparum*-infected erythrocytes in a parity-dependent manner and  
604 block parasite adhesion to chondroitin sulphate A. *J Immunol* 165:3309-3316.
- 605 Rogerson, S.J., L. Hviid, P.E. Duffy, R.F.G. Leke, and D.W. Taylor. 2007. Malaria in pregnancy:  
606 pathogenesis and immunity. *Lancet Infect Dis* 7:105-117.
- 607 Salanti, A., M. Dahlback, L. Turner, M.A. Nielsen, L. Barfod, P. Magistrado, A.T. Jensen, T.  
608 Lavstsen, M.F. Ofori, K. Marsh, L. Hviid, and T.G. Theander. 2004. Evidence for the  
609 involvement of VAR2CSA in pregnancy-associated malaria. *J Exp Med* 200:1197-1203.
- 610 Scallan, B.J., E. Scigliano, V.H. Freedman, M.C. Miedel, Y.C. Pan, J.C. Unkeless, and J.P. Kochan.  
611 1989. A human immunoglobulin G receptor exists in both polypeptide-anchored and  
612 phosphatidylinositol-glycan-anchored forms. *Proc Natl Acad Sci U S A* 86:5079-5083.
- 613 Schmiegelow, C., S. Matondo, D.T.R. Minja, M. Resende, C. Pehrson, B.B. Nielsen, R. Olomi,  
614 M.A. Nielsen, P. Deloron, A. Salanti, J. Lusingu, and T. Theander. 2017. *Plasmodium*

615 *falciparum* infection early in pregnancy has profound consequences for fetal growth. *J Infect*  
616 *Dis* 216:1601-1610.

617 Selman, M.H., S.E. de Jong, D. Soonawala, F.P. Kroon, A.A. Adegnika, A.M. Deelder, C.H.  
618 Hokke, M. Yazdanbakhsh, and M. Wuhrer. 2012. Changes in antigen-specific IgG1 Fc N-  
619 glycosylation upon influenza and tetanus vaccination. *Mol Cell Proteomics* 11:M111 014563.

620 Shields, R.L., J. Lai, R. Keck, L.Y. O'Connell, K. Hong, Y.G. Meng, S.H. Weikert, and L.G. Presta.  
621 2002. Lack of fucose on human IgG1 N-linked oligosaccharide improves binding to human  
622 FcγRIII and antibody-dependent cellular toxicity. *J Biol Chem* 277:26733-26740.

623 Sirima, S.B., L. Richert, A. Chene, A.T. Konate, C. Champion, S. Dechavanne, J.P. Semblat, N.  
624 Benhamouda, M. Bahuaud, P. Loulergue, A. Ouedraogo, I. Nebie, M. Kabore, D. Kargougou,  
625 A. Barry, S.M. Ouattara, V. Boilet, F. Allais, G. Roguet, N. Havelange, E. Lopez-Perez, A.  
626 Kuppers, E. Konate, C. Roussillon, M. Kante, L. Belarbi, A. Diarra, N. Henry, I. Soulama, A.  
627 Ouedraogo, H. Esperou, O. Leroy, F. Batteux, E. Tartour, N.K. Viebig, R. Thiebaut, O.  
628 Launay, and B. Gamain. 2020. PRIMVAC vaccine adjuvanted with Alhydrogel or GLA-SE to  
629 prevent placental malaria: a first-in-human, randomised, double-blind, placebo-controlled  
630 study. *Lancet Infect Dis* 20:585-597.

631 Snyder, K.M., R. Hullsiek, H.K. Mishra, D.C. Mendez, Y. Li, A. Rogich, D.S. Kaufman, J. Wu, and  
632 B. Walcheck 2018. Expression of a recombinant high affinity IgG Fc receptor by engineered  
633 NK cells as a docking platform for therapeutic mAbs to target cancer cells. *Front Immunol*  
634 9:2873.

635 Sonneveld, M.E., J. Koelewijn, M. de Haas, J. Admiraal, R. Plomp, C.A. Koeleman, A.L. Hipgrave  
636 Ederveen, P. Ligthart, M. Wuhrer, C.E. van der Schoot, and G. Vidarsson. 2017. Antigen  
637 specificity determines anti-red blood cell IgG-Fc alloantibody glycosylation and thereby  
638 severity of haemolytic disease of the fetus and newborn. *Br J Haematol* 176:651-660.

639 Sonneveld, M.E., S. Natunen, S. Sainio, C.A. Koeleman, S. Holst, G. Dekkers, J. Koelewijn, J.  
640 Partanen, C.E. van der Schoot, M. Wuhrer, and G. Vidarsson. 2016. Glycosylation pattern of  
641 anti-platelet IgG is stable during pregnancy and predicts clinical outcome in alloimmune  
642 thrombocytopenia. *Br J Haematol* 174:310-320.

643 Srivastava, A., S. Gangnard, S. Dechavanne, F. Amirat, B.A. Lewit, G.A. Bentley, and B. Gamain.  
644 2011. Var2CSA minimal CSA binding region is located within the N-terminal region. *PLoS*  
645 *ONE* 6:e20270.

646 Srivastava, A., S. Gangnard, A. Round, S. Dechavanne, A. Juillerat, B. Raynal, G. Faure, B. Baron,  
647 S. Ramboarina, S.K. Singh, H. Belrhali, P. England, A. Lewit-Bentley, A. Scherf, G.A.  
648 Bentley, and B. Gamain. 2010. Full-length extracellular region of the var2CSA variant of  
649 PfEMP1 is required for specific, high-affinity binding to CSA. *Proc Natl Acad Sci U S A*  
650 107:4884-4889.

651 Staalsoe, T., R. Megnekou, N. Fievet, C.H. Ricke, H.D. Zornig, R. Leke, D.W. Taylor, P. Deloron,  
652 and L. Hviid. 2001. Acquisition and decay of antibodies to pregnancy-associated variant  
653 antigens on the surface of *Plasmodium falciparum* infected erythrocytes that are associated  
654 with protection against placental parasitemia. *J Infect Dis* 184:618-626.

655 Staalsoe, T., C.E. Shulman, J.N. Bulmer, K. Kawuondo, K. Marsh, and L. Hviid. 2004. Variant  
656 surface antigen-specific IgG and protection against the clinical consequences of pregnancy-  
657 associated *Plasmodium falciparum* malaria. *Lancet* 363:283-289.

658 Stevenson, L., P. Huda, A. Jeppesen, E. Laursen, J.A. Rowe, A. Craig, W. Streicher, L. Barfod, and  
659 L. Hviid. 2015. Investigating the function of F<sub>c</sub>-specific binding of IgM to *Plasmodium*  
660 *falciparum* erythrocyte membrane protein 1 mediating erythrocyte rosetting. *Cell Microbiol*  
661 17:819-831.



- 662 Temming, A.R., S.W. de Taeye, E.L. de Graaf, L.A. de Neef, G. Dekkers, C.W. Bruggeman, J.  
663 Koers, P. Ligthart, S.Q. Nagelkerke, J.C. Zimring, T.W. Kuijpers, M. Wuhrer, T. Rispens, and  
664 G. Vidarsson. 2019. Functional attributes of antibodies, effector cells, and target cells  
665 affecting NK cell–mediated antibody-dependent cellular cytotoxicity. *J Immunol* 203:3126-  
666 3135.
- 667 Theisen, M., J. Vuust, A. Gottschau, S. Jepsen, and B. Hogh. 1995. Antigenicity and  
668 immunogenicity of recombinant glutamate-rich protein of *Plasmodium falciparum* expressed  
669 in *Escherichia coli*. *Clin Diagn Lab Immunol* 2:30-34.
- 670 Tuikue Ndam, N.G., A. Salanti, G. Bertin, M. Dahlbäck, N. Fievet, L. Turner, A. Gaye, T.G.  
671 Theander, and P. Deloron. 2005. High level of *var2csa* transcription by *Plasmodium*  
672 *falciparum* isolated from the placenta. *J Infect Dis* 192:331-335.
- 673 Tuikue Ndam, N.G., A. Salanti, J.-Y. Le-Hesran, G. Cottrell, N. Fievet, L. Turner, S. Sow, J.-M.  
674 Dangou, T. Theander, and P. Deloron. 2006. Dynamics of anti-VAR2CSA immunoglobulin G  
675 response in a cohort of Senegalese pregnant women. *J Infect Dis* 193:713-720.
- 676 Turner, L., T. Lavstsen, S.S. Berger, C.W. Wang, J.E. Petersen, M. Avril, A.J. Brazier, J. Freeth,  
677 J.S. Jespersen, M.A. Nielsen, P. Magistrado, J. Lusingu, J.D. Smith, M.K. Higgins, and T.G.  
678 Theander. 2013. Severe malaria is associated with parasite binding to endothelial protein C  
679 receptor. *Nature* 498:502-505.
- 680 Vestrheim, A.C., A. Moen, W. Egge-Jacobsen, L. Reubsæet, T.G. Halvorsen, D.B. Bratlie, B.S.  
681 Paulsen, and T.E. Michaelsen. 2014. A pilot study showing differences in glycosylation  
682 patterns of IgG subclasses induced by pneumococcal, meningococcal, and two types of  
683 influenza vaccines. *Immun Inflamm Dis* 2:76-91.
- 684 Vidarsson, G., G. Dekkers, and T. Rispens. 2014. IgG subclasses and allotypes: from structure to  
685 effector functions. *Front Immunol* 5:520.

- 686 Viebig, N.K., B. Gamain, C. Scheidig, C. Lepolard, J. Przyborski, M. Lanzer, J. Gysin, and A.  
687 Scherf. 2005. A single member of the *Plasmodium falciparum* var multigene family  
688 determines cytoadhesion to the placental receptor chondroitin sulphate A. *EMBO Reports*  
689 6:775-781.
- 690 Wang, T.T., J. Sewatanon, M.J. Memoli, J. Wrammert, S. Bournazos, S.K. Bhaumik, B.A. Pinsky,  
691 K. Chokephaibulkit, N. Onlamoon, K. Pattanapanyasat, J.K. Taubenberger, R. Ahmed, and  
692 J.V. Ravetch. 2017. IgG antibodies to dengue enhanced for FcγRIIIA binding determine  
693 disease severity. *Science* 355:395-398.
- 694 World Health Organization. 2020. World malaria report 2020.
- 695 Wuhrer, M., L. Porcelijn, R. Kapur, C.A. Koeleman, A. Deelder, M. de Haas, and G. Vidarsson.  
696 2009. Regulated glycosylation patterns of IgG during alloimmune responses against human  
697 platelet antigens. *J Proteome Res* 8:450-456.

698 **Abbreviations**

699 ADCC: Antibody-dependent cellular cytotoxicity; CM: Cerebral malaria; Fc: fragment  
700 crystallizable; Fc $\gamma$ R: Fc $\gamma$  receptor; GlcNac: N-acetylglucosamin; GLURP: Glutamate-rich protein;  
701 IgG: Immunoglobulin G; IE = Infected erythrocyte; MBD: Minimal-binding domain;  
702 PBS: Phosphate-buffered saline; PBS-T = PBS supplemented with TWEEN20;  
703 PfEMP1: *Plasmodium falciparum* erythrocyte membrane protein-1; PM: placental malaria.

704 **Figure legends**

705 ***Figure 1. Background and study workflow***

706 (A) IgG1 specific for the merozoite antigen GLURP and two members of the PfEMP1 family  
707 expressed on the surface of IEs were analyzed in this study. Most PfEMP1 variants facilitate  
708 sequestration of IEs to vascular endothelium (exemplified here by VAR6), while VAR2CSA-type  
709 PfEMP1 mediate IE sequestration in the placental syncytiotrophoblast and intervillous space. (B)  
710 Plasma samples were split and used to purify total plasma IgG1 and antigen-specific IgG1, using  
711 protein G-coupled sepharose and solid-phase absorption with recombinant antigens, respectively.  
712 Eluted IgG1 was digested with trypsin and the glycopeptides analyzed by liquid chromatography  
713 mass spectrometry (LC-MS). Examples of MS spectra of total IgG1 (left) and antigen-specific (anti-  
714 VAR6) IgG1 (right) from one sample is shown. (C) The fractions of the different glycosylation  
715 traits of the Fc glycan depicted were calculated from LC-MS spectra.

716 ***Figure 2. Fc fucosylation of naturally acquired P. falciparum-specific IgG depends on antigen***  
717 ***location and exposure***

718 (A) Fc fucosylation levels of total plasma IgG1 (gray, n=127) and IgG1 specific for  
719 VAR2CSA (orange, n=117), VAR6 (green, n=121), and GLURP (blue, n=88) in Ghanaian pregnant  
720 women (left four panels). Fc fucosylation levels of total plasma IgG1 from unexposed Dutch  
721 women (n=5) were included for comparison (right panel). Medians and densities are shown.  
722 Statistically significant pairwise differences (multiple Wilcoxon signed rank test with Bonferroni  
723 correction) are indicated (\*\*\*\*: P<0.0001). (B-E) Correlations of (B) VAR2CSA-, (C) VAR6-, (D)  
724 GLURP-specific and (E) total IgG1-Fc fucosylation levels with parity. P-values, and correlation  
725 coefficients are shown. Statistical significance of correlations (Spearman's correlations. \*: P<0.05;  
726 \*\*: P<0.01; \*\*\*: P<0.001; \*\*\*\*: P<0.0001.

727 **Figure 3. Fc fucosylation levels of VAR2CSA-specific IgG is temporally stable**

728 Fc fucosylation levels of total plasma IgG1 (gray, n=72) and IgG1 with specificity for  
729 VAR2CSA (orange, n=50), VAR6 (green, n=65), and GLURP (blue, n=43) in non-pregnant  
730 Ghanaian women exposed to VAR2CSA during one or more previous pregnancies. Fc fucosylation  
731 levels of total plasma IgG1 from unexposed Dutch females (n=5) are included as controls. Medians  
732 and densities are shown. **(B)** Correlation between fucosylation levels of VAR2CSA-specific IgG1  
733 and parity. **(C)** Correlation between fucosylation levels of VAR2CSA-specific IgG1 and time since  
734 last pregnancy. P-values, and correlation coefficients are shown. Statistically significant differences  
735 calculated and indicated as in Fig. 2.

736 **Figure 4. VAR2CSA-specific IgG induced by subunit vaccination is not Fc-afucosylated**

737 Fc fucosylation levels of total (gray) and VAR2CSA-specific (orange) plasma IgG1 in  
738 German vaccinees (n=32) without **(A)** and in Beninese vaccinees (n=18) with **(B)** natural exposure  
739 to *P. falciparum*. Medians and densities are shown. Statistically significant differences calculated  
740 and indicated as in Fig. 2.

741 **Figure 5. Only afucosylated PfEMP-1 specific IgG induces NK cell-mediated ADCC**

742 Association between **(A)** VAR2CSA-specific IgG levels or **(B)** Fc fucosylation of  
743 VAR2CSA-specific IgG and CD107a expression on NK92-CD16a cells. Spearman's rank  
744 correlation (r) and p values are shown for highly fucosylated (filled symbols) and afucosylated anti-  
745 VAR2CSA IgG (open symbols) samples, respectively. The groups were compared by Mann-  
746 Whitney test. **(C)** Similarly, the VAR2CSA-specific, human monoclonal antibody PAM1.4 as either  
747 fucosylated or afucosylated IgG1 was titrated in the same assay and measured for binding or **(D)**  
748 degranulation activity (CD107a expression) on NK92-CD16a cells. Data represent mean values  $\pm$   
749 SD from three independent experiments.

750 ***Supplementary Figure 1. Fc glycosylation traits of P. falciparum-specific IgG in pregnant***  
751 ***women***

752 (A, D, G, and J) Fc galactosylation-, (B, E, H, and K) Fc sialylation-, and (C, F, I, and J) Fc  
753 bisecting GlcNAc levels of total IgG1 (gray) and IgG1 with specificity for VAR2CSA (orange),  
754 VAR6 (green), and GLURP (blue) in (A to C) pregnant Ghanaian women, (D to F) non-pregnant  
755 Ghanaian women, (G to I) *P. falciparum*-naïve German and (J to L) VAR2CSA-naïve Beninese  
756 vaccinees. Medians and densities are shown. Statistically significant differences calculated and  
757 indicated as in Fig. 2.

758 **Supplementary Table 1**

759 *Summary statistics of plasma donors studies*

| <b>Cohort</b>                                        | <b>Origin</b> | <b>Donors (N)</b> | <b>Women (N; %)</b> | <b>Age (median; inter-quartile range (in years))</b> | <b>Ref.</b>               |
|------------------------------------------------------|---------------|-------------------|---------------------|------------------------------------------------------|---------------------------|
| <i>P. falciparum</i> -exposed and pregnant           | Ghana         | 127               | 127; 100%           | 24; 20-27                                            | (Ofori et al., 2009)      |
| <i>P. falciparum</i> -exposed and non-pregnant women | Ghana         | 72                | 72; 100%            | 29; 23-38                                            | (Ampomah et al., 2014a)   |
| Non-exposed vaccinees                                | Germany       | 36                | n.a. <sup>1</sup>   | Adults <sup>1</sup>                                  | (Mordmuller et al., 2019) |
| <i>P. falciparum</i> -exposed vaccinees              | Benin         | 21                | 21; 100%            | Adults <sup>1</sup>                                  | (unpublished)             |

760 <sup>1</sup> Data not available due to blinding of the clinical trial data

761 **Supplementary Table 2**

762 *Overview of included Fc glycopeptides*

| N-Glycopeptide        | m/z 2+   | m/z 3+    | Retention time (sec) |
|-----------------------|----------|-----------|----------------------|
| IgG1 H3N4F1S0 [G0F]   | 1317.526 | 878.687   | 80                   |
| IgG1 H4N4F1S0 [G1F]   | 1398.552 | 932.704   | 78                   |
| IgG1 H5N4F1S0 [G2F]   | 1479.579 | 986.722   | 77                   |
| IgG1 H3N5F1S0 [G0FN]  | 1419.066 | 946.380   | 81                   |
| IgG1 H4N5F1S0 [G1FN]  | 1500.092 | 1000.398  | 79                   |
| IgG1 H5N5F1S0 [G2FN]  | 1581.119 | 1054.415  | 78                   |
| IgG1 H3N4F0S0 [G0]    | 1244.497 | 830.001   | 83                   |
| IgG1 H4N4F0S0 [G1]    | 1325.524 | 884.018   | 82                   |
| IgG1 H5N4F0S0 [G2]    | 1406.550 | 938.036   | 81                   |
| IgG1 H3N5F0S0 [G0N]   | 1346.037 | 897.694   | 83                   |
| IgG1 H4N5F0S0 [G1N]   | 1427.063 | 951.712   | 82                   |
| IgG1 H5N5F0S0 [G2N]   | 1508.090 | 1005.729  | 79                   |
| IgG1 H4N4F1S1 [G1FS]  | 1544.100 | 1029.736  | 77                   |
| IgG1 H5N4F1S1 [G2FS]  | 1625.127 | 1083.754  | 75                   |
| IgG1 H4N5F1S1 [G1FNS] | 1645.640 | 1097.429  | 77                   |
| IgG1 H5N5F1S1 [G2FNS] | 1726.667 | 1151.447  | 77                   |
| IgG1 H4N4F0S1 [G1S]   | 1471.071 | 981.050   | 80                   |
| IgG1 H5N4F0S1 [G2S]   | 1552.098 | 1035.068  | 79                   |
| IgG1 H4N5F0S1 [G1NS]  | 1572.611 | 1048.743  | 77                   |
| IgG1 H5N5F0S1 [G2NS]  | 1653.638 | 1102.7610 | 77                   |
| IgG1 H5N4F1S2 [G2FS2] | 1770.675 | 1180.786  | 76                   |



**A**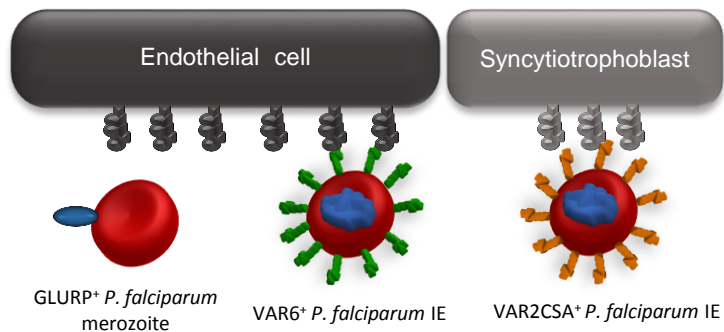**B**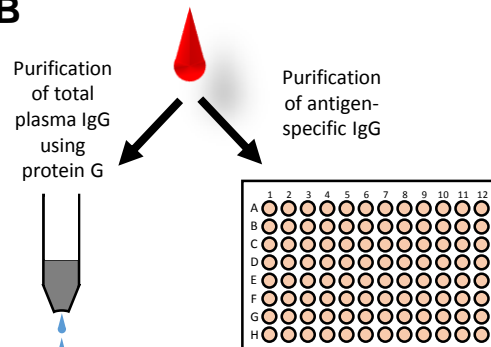**C**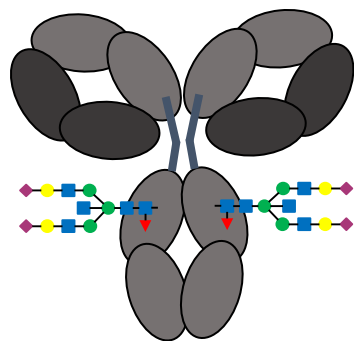

- = N-Acetylglucosamine
- = Mannose
- = Galactose
- ▼ = Fucose
- ◆ = Sialic acid

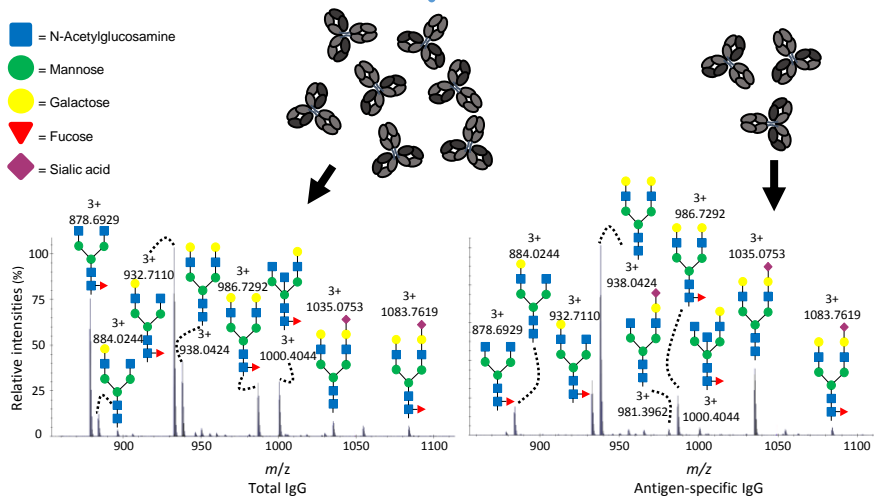

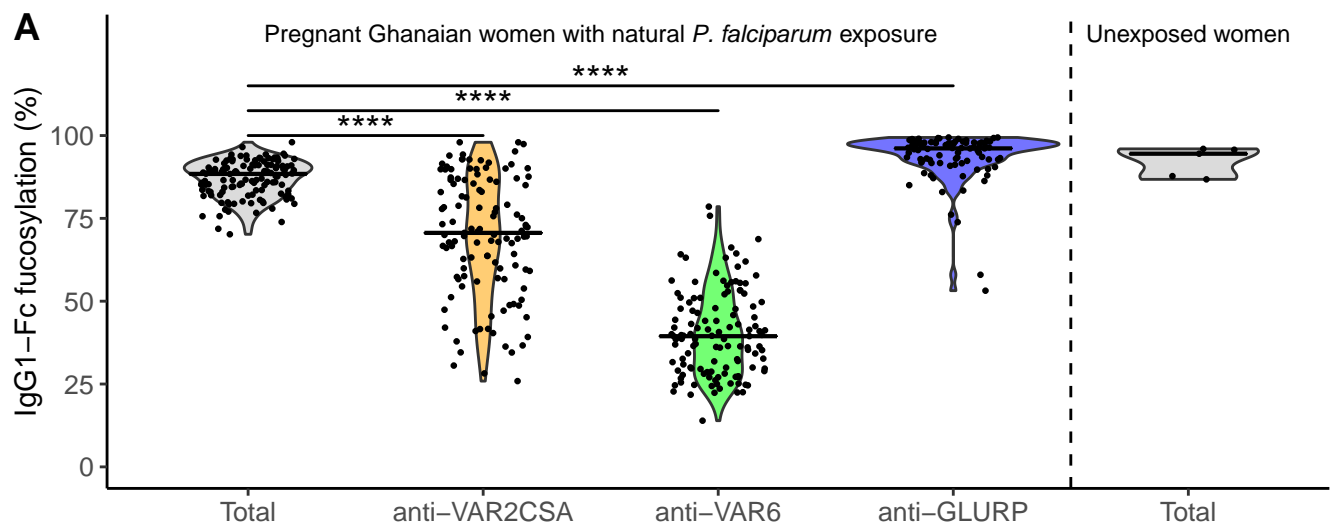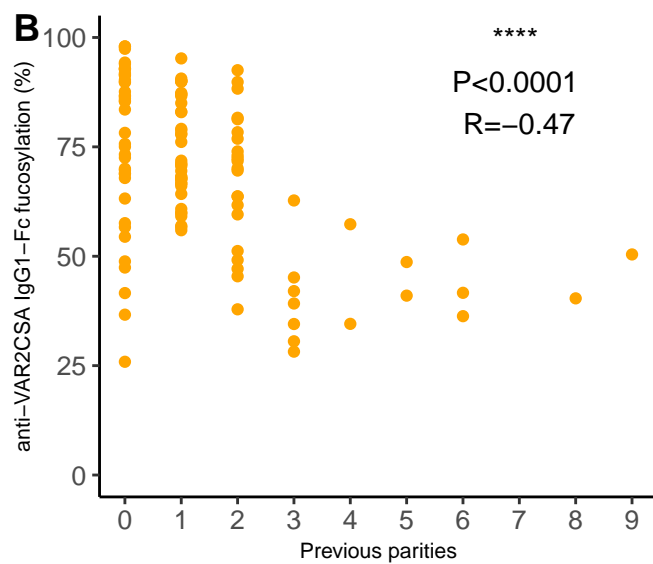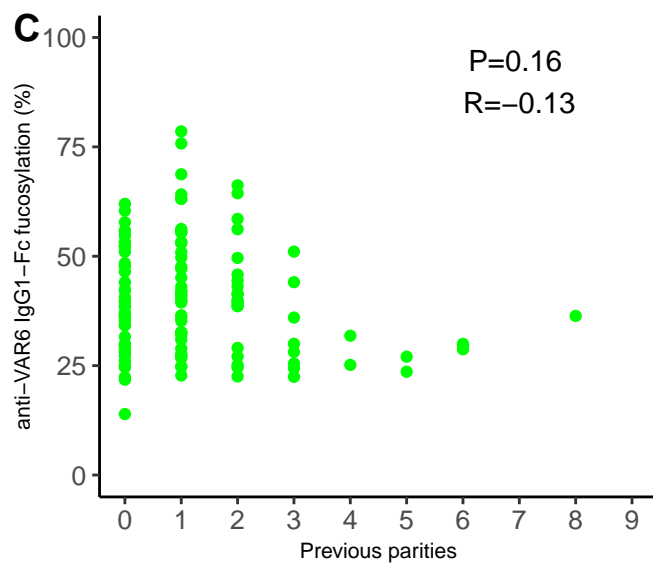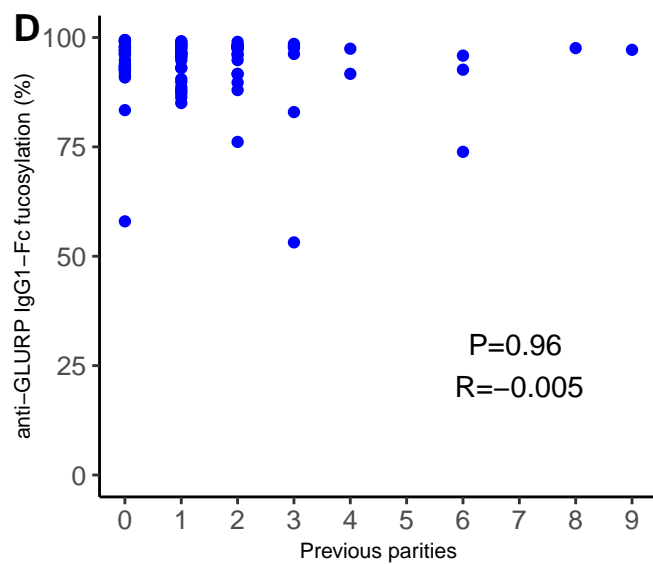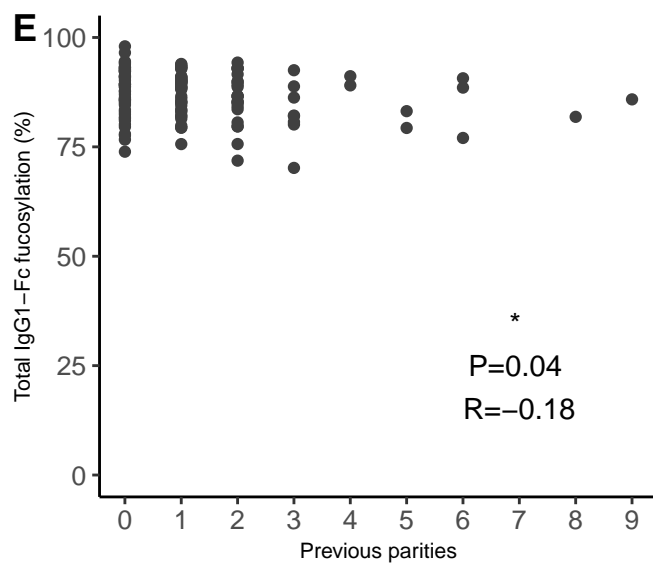

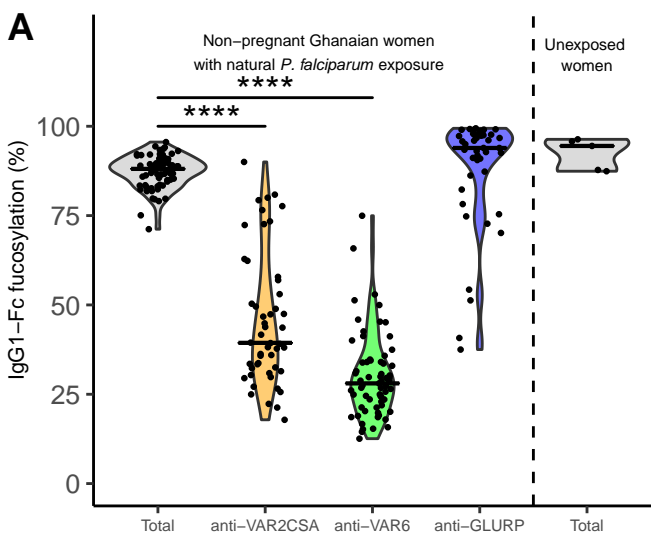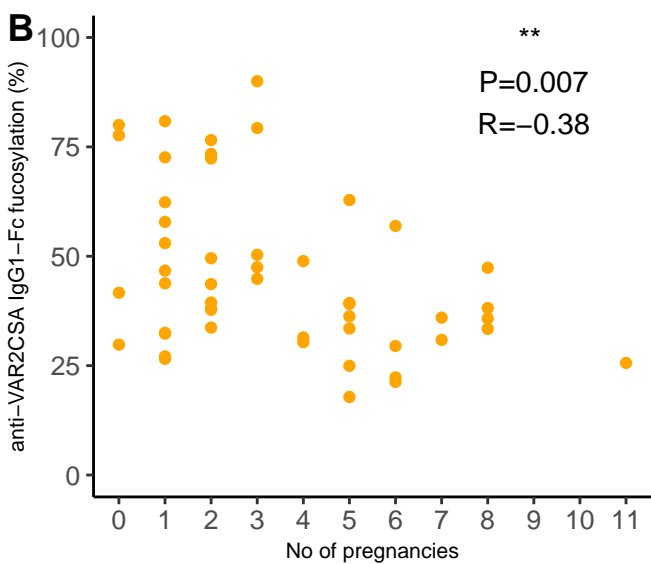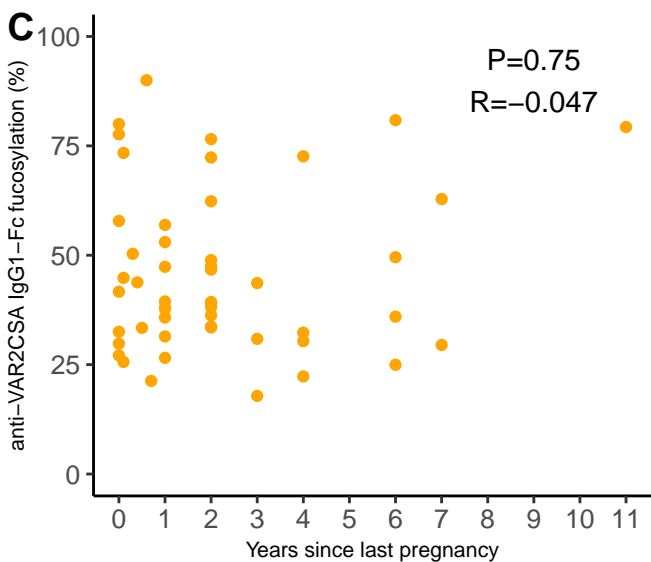



A

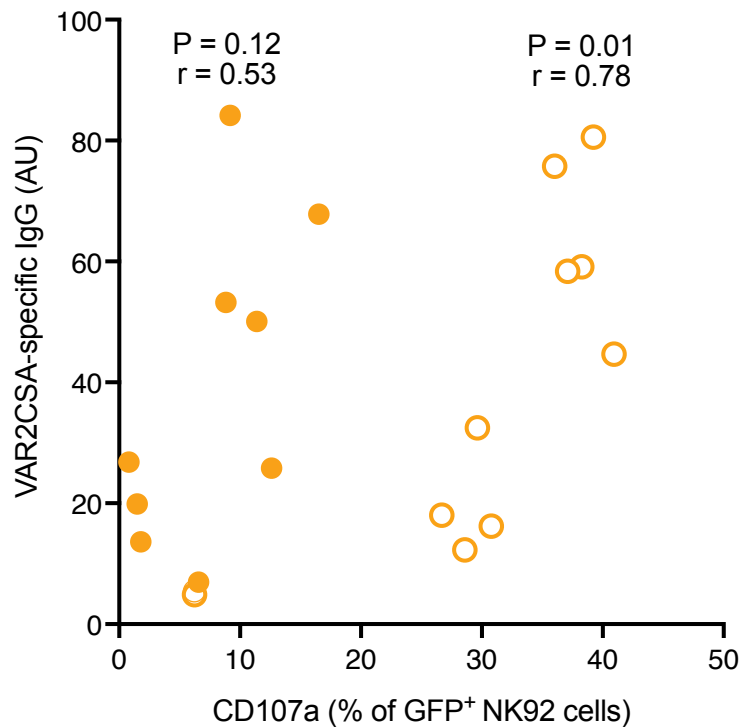

B

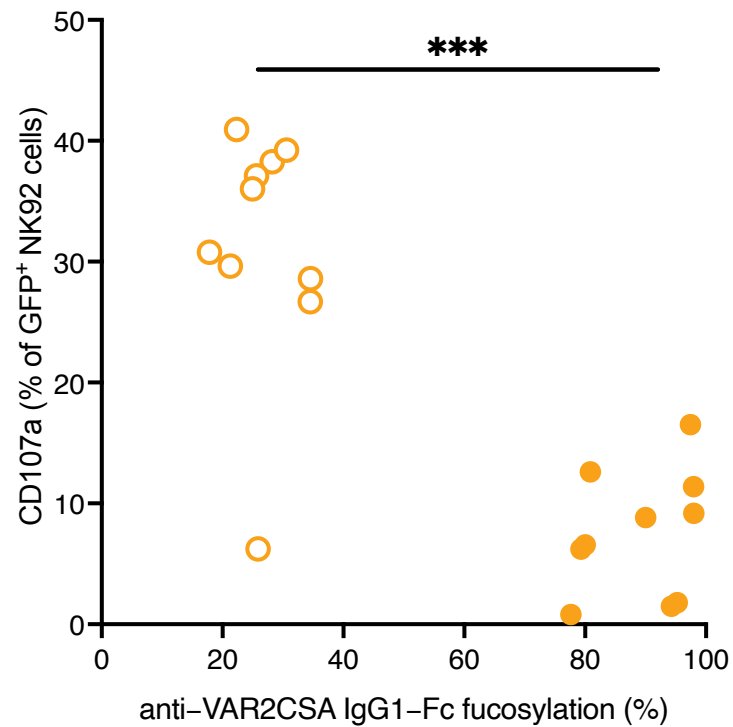

C

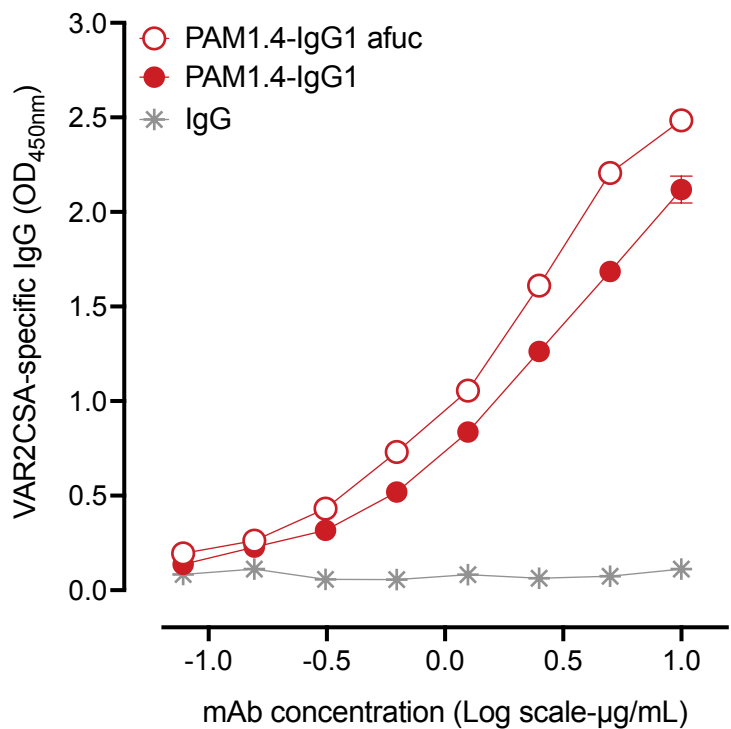

D

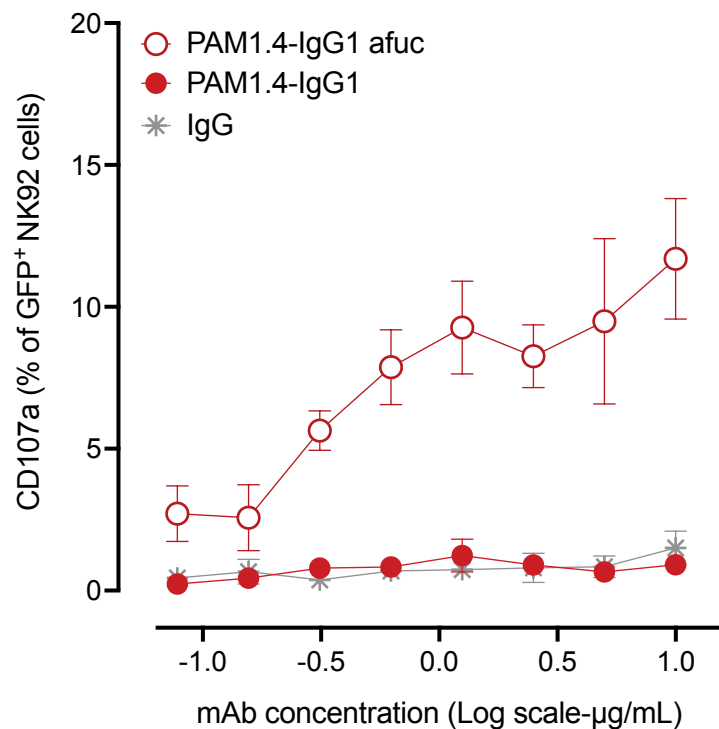

Source: https://biorxiv.org/content/10.1101/2021.04.23.441082v1.full.pdf
